# Supplementary material for: Development and implementation of a new biomass burning emissions injection height scheme (BBEIH v1.0) for the GEOS-Chem model (v9-01-01)
Source: Copernicus journal article supplement (doi:10.5194/gmd-11-4103-2018), 2018-10-11
Supplement: Supplementary file 1 [file gmd-11-4103-2018-supplement.zip]

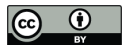

## *Supplement of*

# **Development and implementation of a new biomass burning emissions injection height scheme (BBEIH v1.0) for the GEOS-Chem model (v9-01-01)**

**Liye Zhu et al.**

*Correspondence to:* Emily V. Fischer (evf@atmos.colostate.edu)

- gmd-11-4103-2018-supplement-title-page.pdf
- Files\_for\_Archiving\_at\_CSU
  - .DS\_Store
  - fire\_injheight\_GEOS\_Chem\_c20170404.nc
  - readme\_injectionschemecode.docx
  - setemis.F

The copyright of individual parts of the supplement might differ from the CC BY 4.0 License.
